## RESEARCH ARTICLE

# A p53-like transcription factor, BbTFO1, contributes to virulence and oxidative and thermal stress tolerances in the insect pathogenic fungus, *Beauveria bassiana*

Juan-Juan Wang<sup>1\*</sup>, Ya-Ping Yin<sup>1</sup>, Ji-Zheng Song<sup>2,3</sup>, Shun-Juan Hu<sup>2</sup>, Wen Cheng<sup>3</sup>, Lei Qiu<sup>1,2\*</sup>

**1** School of Biological Science and Technology, University of Jinan, Jinan, China, **2** State Key Laboratory of Biobased Material and Green Papermaking, Qilu University of Technology, Shandong Academy of Sciences, Jinan, China, **3** Maize Research Institute, Shandong Academy of Agricultural Sciences, Jinan, China

\* [wjj880414@163.com](mailto:wjj880414@163.com) (JJW); [qiulei.2005@163.com](mailto:qiulei.2005@163.com) (LQ)

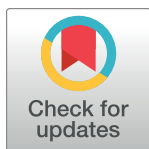

## OPEN ACCESS

**Citation:** Wang J-J, Yin Y-P, Song J-Z, Hu S-J, Cheng W, Qiu L (2021) A p53-like transcription factor, BbTFO1, contributes to virulence and oxidative and thermal stress tolerances in the insect pathogenic fungus, *Beauveria bassiana*. PLoS ONE 16(3): e0249350. <https://doi.org/10.1371/journal.pone.0249350>

**Editor:** Katherine A. Borkovich, University of California Riverside, UNITED STATES

**Received:** October 8, 2020

**Accepted:** March 16, 2021

**Published:** March 31, 2021

**Copyright:** © 2021 Wang et al. This is an open access article distributed under the terms of the [Creative Commons Attribution License](https://creativecommons.org/licenses/by/4.0/), which permits unrestricted use, distribution, and reproduction in any medium, provided the original author and source are credited.

**Data Availability Statement:** All relevant data are within the manuscript and its [Supporting information](#) files.

**Funding:** National Natural Science Foundation of China (Grants 31800062), Lei Qiu; National Natural Science Foundation of China (Grants 31600063), Juan-Juan Wang; Youth Doctor Cooperation Fund Project (2019BSHZ0030), Qilu University of Technology, Shandong Academy of Sciences, Lei Qiu.

## Abstract

The p53-like transcription factor (TF) NDT80 plays a vital role in the regulation of pathogenic mechanisms and meiosis in certain fungi. However, the effects of NDT80 on entomopathogenic fungi are still unknown. In this paper, the NDT80 orthologue BbTFO1 was examined in *Beauveria bassiana*, a filamentous entomopathogenic fungus, to explore the role of an NDT80-like protein for fungal pest control potential. Disruption of *BbTFO1* resulted in impaired resistance to oxidative stress (OS) in a growth assay under OS and a 50% minimum inhibitory concentration experiment. Intriguingly, the oxidation resistance changes were accompanied by transcriptional repression of the two key antioxidant enzyme genes *cat2* and *cat5*.  $\Delta BbTFO1$  also displayed defective conidial germination, virulence and heat resistance. The specific supplementation of *BbTFO1* reversed these phenotypic changes. As revealed by this work, BbTFO1 can affect the transcription of catalase genes and play vital roles in the maintenance of phenotypes associated with the biological control ability of *B. bassiana*.

## Introduction

The p53-like transcription factor (TF) superfamily includes the NDT80/PhoG-like DNA-binding family (<http://pfam.xfam.org/family/PF05224>), which has only been discovered in unikont lineages [1]. NDT80-like proteins have different functions in different fungi, such as regulation of sexual development, meiosis, filamentation, virulence, drug resistance, programmed cell death and the response to nutrient stress [1, 2]. The NDT80 protein of *Saccharomyces cerevisiae* is considered to be the founding member of the NDT80 family within the p53-like superfamily [1] and a key regulator of sporulation and meiosis [3]. XprG, also known as an NDT80-like protein, positively regulates mycotoxin generation, carbon depletion-induced apoptosis, and extracellular protease expression in *Aspergillus nidulans* [4]. This protein is

**Competing interests:** The authors have declared that no competing interests exist.

similar to *Neurospora crassa* VIB-1, which plays a role in gene expression related to the positive regulation of extracellular protease generation as well as heterokaryon incompatibility-related apoptosis [2, 3, 5]. In *Candida albicans*, the roles of three NDT80-like proteins have been extensively studied. As regulators, CaNDT80 and CaRep1 control transporters (CDR1 and MDR1), which can eliminate drugs [6, 7]. Mutations in *CaNDT80* and *CaRON1* affect the induction of hyphal growth [7]. The *CaNDT80* mutant also shows weakened virulence in a mouse model of infection [8]. *NDT80* homologue mutations have certain impacts on secondary metabolism, including asexual or sexual spore pigmentation. *N. crassa*  $\Delta$ *vib-1* mutants show pinkish conidia but not orange conidia (asexual spores); by contrast, mutants of XprG in *A. fumigatus* and *A. nidulans* possess pale conidia [3, 9]. Moreover, NDT80-like proteins are involved in fungal nutrition sensing. For example, suppressor of fusion (Suf), the Ndt80 homologue in *Fusarium oxysporum*, plays a vital role in regulating anastomosis depending on the nutrient [10]. As far as *Trichoderma reesei* is concerned, this protein also plays an important role in activating the *N*-acetylglucosamine (GlcNAc) gene cluster [2, 11]. *C. albicans* Rep1 and *A. nidulans* XprG are also required for GlcNAc catabolism [7].

The genus *Beauveria*, including the species *B. bassiana*, represents a strong insect pathogen with a wide range of hosts and has been prepared as a candidate mycoinsecticide with environmental friendliness [12]. As an important filamentous insect fungal pathogen, *B. bassiana* is the typical model for examining the pathogenic mechanism and growth of fungi together with their interactions with the host [13, 14]. Recently, some TFs in *B. bassiana* have been characterized. Typically, the *BbMbp1* gene facilitates the transition of *B. bassiana* morphology with regard to saprophytic and pathogenic growth through a variety of genetic pathways [15]. In addition, in *B. bassiana*, the MADS-box TF *Bbmcm1* plays a vital role in the regulation of the cell cycle, virulence and integrity [16]. Moreover, *BbOhmm* affects the homeostasis of reactive oxygen species (ROS) combined with the available oxygen to control *BbSre1* transcriptional activity, thus regulating the homeostasis of mitochondrial iron, respiration-related genes and haem production to adapt to hypoxic conditions [14].

In our study, it is shown that the NDT80-like protein in *B. bassiana* plays an important role in oxidative stress (OS) resistance by impacting the expression of key catalase genes. Therefore, this protein was designated TFO1 (transcription factor regulating oxidation) in *B. bassiana*. This study was conducted to examine how BbTFO1 affects *B. bassiana* phenotypic changes related to its biological control ability through multi-phenotypic analyses of specific gene deletion or complementation strains combined with the parental WT. The results indicate that BbTFO1 plays an important role in regulating antioxidant effects, thermotolerance and pathogenesis in insect fungal pathogens.

## Materials and methods

### Phylogenetic analysis of BbTFO1

In NCBI databases, using the *S. cerevisiae* *NDT80* sequence as a query, BLAST analysis based on NCBI was carried out to identify the genome from ARSEF 2860, the wild-type *B. bassiana* strain (WT), and some typical filamentous fungi. Next, each NDT80 homologous protein sequence found in the fungi was aligned to compare the structures and analyse the phylogenetics using MEGA7 (<http://www.megasoftware.net>).

### Construction of *BbTFO1* deletion and complementation mutants

*BbTFO1* deletion together with a complementation mutant was created via *Agrobacterium*-mediated transformation [17]. The synthetic plasmids for homologous transformation were transformed by *Agrobacterium tumefaciens* and mobilized into *B. bassiana* according to a

Table 1. Paired primers used for gene cloning, deletion, complement and expression.

| Primers    | Paired sequences (5'-3')*                                                                            | Purpose                           |
|------------|------------------------------------------------------------------------------------------------------|-----------------------------------|
| TFO1up-F/R | AAAGAATTCGAGCATCATCGAGACTTG/AAAGGATCCGGATGGACAGGGAGGTAAA                                             | Cloning 5' <i>BbTFO1</i>          |
| TFO1dn-F/R | AAATCTAGAGCGTGGTAACTCTGGAATG/AAAAGATCTGACGCTTGCTCGCTCTT                                              | Cloning 3' <i>BbTFO1</i>          |
| TFO1fl-F/R | GGGGACAAGTTTGTACAAAAAAGCAGGCTGCACCAAGGTTGAGATAGA/<br>GGGGACCACTTTGTACAAGAAAGCTGGGTCCAGAAACAGAACGAAAA | Cloning full-length <i>BbTFO1</i> |
| pTFO1-F/R  | AAATCGTGGGGTCTGTGTTA/AAATGCTGTATTGGCGTTGC                                                            | PCR detecting <i>BbTFO1</i>       |
| qTFO1-F/R  | GAGGATTGCGGTGTCATA/CACTGCCACTATTTCGGATA                                                              | qPCR detecting <i>BbTFO1</i>      |
| q18S-F/R   | TGGTTCTTAGGACCCCGTAA/CCTTGGCAAATGCTTTCCG                                                             | qPCR detecting 18S rRNA           |
| qcat1-F/R  | CCGTCTGGGCATCAACTGGGAAG/GCTGGGCGTGGTCTGGTGTAG                                                        | qPCR detecting <i>Bbcat1</i>      |
| qcat2-F/R  | CCTCTGACGTTGGCGGCCCTTTC/CCGTGTCCGTGTCCTCGTG                                                          | qPCR detecting <i>Bbcat2</i>      |
| qcat3-F/R  | GAGGAGCCCAGCAACGCACAAGAG/TGAGGACGACAAGGCCGCCATT                                                      | qPCR detecting <i>Bbcat3</i>      |
| qcat4-F/R  | CGGCTGCGGTGCTTTGTCCATAC/CCTTGTGGCGTCTGGCGAAG                                                         | qPCR detecting <i>Bbcat4</i>      |
| qcat5-F/R  | GCTGGGCTGATCTGCTGGTCTCTG/TCCTTGTGTAAACGGTGGCTGTCG                                                    | qPCR detecting <i>Bbcat5</i>      |
| qcat6-F/R  | TCAAGTCGGTTCAGGAGATGGAG/TTGTTGCTCTTCAATCGGAGTG                                                       | qPCR detecting <i>Bbcat6</i>      |
| qSod1-F/R  | GCGGCTCCACATCCACACCTTTG/GGTCCAGCGTTGCCAGTCTTGAG                                                      | qPCR detecting <i>BbSod1</i>      |
| qSod2-F/R  | CCAGTGTGGCATTGACATG/TCAGCCGCTTCCAGTTGATG                                                             | qPCR detecting <i>BbSod2</i>      |
| qSod3-F/R  | TCTCCGGCAAGATTATGGAGC/TTGGCGTCATTCTTGGCCT                                                            | qPCR detecting <i>BbSod3</i>      |
| qSod4-F/R  | CGAGATGGTCTTACGGCTTCAG/GCTCCCAGGTGTTGAGGCATAG                                                        | qPCR detecting <i>BbSod4</i>      |
| qSod5-F/R  | CGGCGACCTCAGCGGCAAGTAC/GCCAGCAACAACAGGGACCGTAGG                                                      | qPCR detecting <i>BbSod5</i>      |
| qOhmm-F/R  | CACGATATACAGAACCATTCC/CAGTCCATACACCACCTT                                                             | qPCR detecting <i>BbOhmm</i>      |

\* Underlined regions suggest the sites of restriction enzyme in the *BbTFO1* deletion mutant (*EcoRI/BamHI* and *XbaI/BglII*) or gateway fragments exchanged for the targeted *BbTFO1* complementation mutant.

<https://doi.org/10.1371/journal.pone.0249350.t001>

previous procedure [18]. Using the paired primers (Table 1), PCR was carried out to clone *BbTFO1* 5' or 3' coding/flanking fragment sequences based on the WT genome, with *TaKaRa La Taq*<sup>®</sup> (TaKaRa, Japan) used as the catalyst, followed by specific enzyme digestion and insertion to the target plasmid to form target gene deletion plasmids. *BbTFO1* was knocked out in the WT by homogenously recombining the 5' and 3' fragments with a *bar* marker. The gene deletion mutant was initially screened by herbicide (200 µg ml<sup>-1</sup> phosphinothricin) resistance [19].

For the reverse complement of the *BbTFO1* deletion mutants, using Gateway BP Clonase<sup>™</sup> II Enzyme Mix (Shanghai, China), primers (Table 1) were used to clone the entire *BbTFO1* coding sequence based on the WT genome, followed by insertion into the p0380-sur-gateway for exchange for gateway fragments, and finally, p0380-sur-*BbTFO1* was formed [20]. The plasmid was transformed in deletion via *Agrobacterium*-mediated transformation to form complementation strains of *BbTFO1*, and a putative complementary strain was selected by chlorimuron ethyl (10 µg ml<sup>-1</sup>) tolerance. Quantitative real-time PCR (qPCR) and PCR were used to detect the expected deletion and complementation strains.

## Multi-phenotypic assays

Phenotypic assays were performed to detect the potential heterogeneities in the phenotype of  $\Delta BbTFO1$  compared with controls (WT and  $\Delta BbTFO1/BbTFO1$ ). All assays were repeated three times.

An appropriate amount of conidial suspension (1 µl, 10<sup>7</sup> conidia ml<sup>-1</sup>, identical concentration hereafter) harvested from SDAY (4% glucose, 1% yeast extract, 1% peptone plus 1.5% agar) plates was spotted onto media containing CPZ (3% sucrose, 0.1% K<sub>2</sub>HPO<sub>4</sub>, 0.3%

NaNO<sub>3</sub>, 0.05% MgSO<sub>4</sub>, 0.001% FeSO<sub>4</sub>, 0.05% KCl combined with 1.5% agar), SDAY and 1/4 SDAY (containing 1/4 of every SDAY nutrient). The diameter of each colony was determined, and photos were taken at day 7 after incubation at temperatures of 25, 30 and 35°C. Additionally, the cross-sectional size of the colony was determined to be the growth rate index of diverse plates.

For chemical stresses, an appropriate amount of conidium suspension (1 µl) was added to CPZ plates containing different chemical stresses, including oxidative (2 mM H<sub>2</sub>O<sub>2</sub> along with 0.2 mM menadione), cell wall (30 µg ml<sup>-1</sup> Congo red) and osmotic (0.5 M NaCl) stressors. The colony diameters were measured and photographed as described earlier, and a CPZ plate without any chemical stress was used as the control.

To better assess how OS affected deletion mutant growth, an appropriate amount of conidium suspension (1 µl) was added to CPZ media containing gradient menadione doses (5–50 µM) and H<sub>2</sub>O<sub>2</sub> (1–4 mM). The diameters of all colonies under OS and the control were measured to calculate the colony area after 7 days of incubation at 25°C. A minimum inhibitory concentration (MIC<sub>50</sub>) value of H<sub>2</sub>O<sub>2</sub> and menadione that suppressed 50% colony growth was adopted as the OS resistance index in every strain.

Several conidial properties related to biocontrol potential were detected. The conidiation on SDAY was measured according to a related description [19]. Briefly, an appropriate amount of conidial suspension (100 µl) was uniformly added onto SDAY media, followed by incubation at 25°C. Then, three rounded cultures were collected from every plate every day by a cork borer (6 mm diameter) from day 5 onwards. The conidia on rounded cultures were completely added to 0.02% Tween-80 (1 ml). Later, conidial suspension content was assessed, followed by conversion to conidia count in the plate culture per unit area. In germination broth (GB: 0.5% peptone and 2% sucrose in 0.02% Tween-80), the median germination time (GT<sub>50</sub>, h) necessary to achieve 50% conidial germination under shaking at 110 rpm and 25/30°C was evaluated to be the conidial viability index at different temperatures [21].

The yield of blastospores was quantified in nitrogen-limited broth (NLB: 0.4% NH<sub>4</sub>NO<sub>3</sub>, 4% glucose, 0.3% MgSO<sub>4</sub>, 0.3% KH<sub>2</sub>PO<sub>4</sub>). Briefly, 40 µl conidial suspensions were added to 20 ml of NLB and cultured at 25°C with shaking (110 rpm). The number of blastospores was counted after 3 days, and then the blastospore production was transformed into cell count per ml culture medium.

Conidial thermotolerance was evaluated using a previously described method [22]. Conidia tolerance to high temperature was defined as the median lethal time (LT<sub>50</sub>, min) when conidia were treated with 0–120 min heat stress exposure at 45°C. In this process, 100 µl samples were taken from each tube at 15 min intervals, and then 1 ml of GB was added. Afterwards, the sample was subjected to 24 h of shaking at 110 rpm and 25°C, and a cytometer was used to evaluate the conidial germination rate microscopically.

## Fungal virulence

*Galleria mellonella* larvae were used to assay fungal virulence according to immersion and injection approaches. The larvae were soaked in conidia suspension for 10 seconds and dry paper towels were used to remove excess liquid from the larvae. For intrahaemocoel injection, 1 µl conidial suspension (5 × 10<sup>5</sup> conidia ml<sup>-1</sup>) was added to the larval haemocoel. The two control groups were exposed to sterile 0.02% Tween-80. Each experiment was carried out three times, with 30 larvae being adopted in every experiment. Moreover, the number of dead larvae was measured at intervals of half a day. After analysing the time-mortality trend, the LT<sub>50</sub> (d) for every strain was determined against every larval group. After curing under the optimal conditions for 6 days, the fungal growth on the surface of the mummified cadavers

was photographed. During fungal virulence assessment, haemolymph samples were extracted from larvae that survived 72 h after injection, and hyphal bodies were formed *in vivo*, as seen by laser scanning confocal microscopy (LEICA DMi8, Germany).

### Transcript profile analysis of antioxidant-related genes

The CAT family, SOD family and *Bbohmm* involved in OS responses were analysed by qPCR. In brief, 100  $\mu$ l of conidial suspensions were inoculated into CPZ medium containing H<sub>2</sub>O<sub>2</sub> (2 mM). After growing at 25°C for 5 days, an RNAiso Plus Kit (TaKaRa, Dalian, China) was utilized to extract total RNA from  $\Delta$ *BbTFO1* and the WT strain. Then, a PrimeScript<sup>RT</sup> reagent kit (TaKaRa) was utilized for cDNA synthesis by reverse transcription. The resultant cDNA was then diluted at 10 ng ml<sup>-1</sup> and adopted as a template in qPCR by the use of paired primers (Table 1) [23]. For *B. bassiana*, 18S rRNA was applied as the internal standard of each transcript. The gene transcriptional level was determined and repeated three times. The relative transcription level of the antioxidant-related genes was calculated as the fold change of the mutant strain transcript relative to the WT strain transcript in stress culture.

### Statistical methods

One-way ANOVA, as well as Tukey's HSD test, were used to analyse phenotype heterogeneities in the WT compared with control strains.

## Results

### BbTFO1 characteristics in and generation of *BbTFO1* mutants

Using the NDT80 sequence of *S. cerevisiae* as a query, the annotated *B. bassiana* ARSEF 2860 strain genome was searched against the NCBI database, generating the most highly related sequence of 502 amino acids (identity: 31%; E-value: 3e-05). Phylogenetic analysis (S1A Fig) showed that the BbTFO1 sequence had the closest relationship with NDT80 from *N. crassa* (XP 011394327) and *T. reesei* (XP 006961996) because they were located on the same branch. Similar to the transcription factor NDT80 of *S. cerevisiae*, BbTFO1 had an NDT80/PhoG-like DNA-binding domain (residues 131–318). Successful *BbTFO1* deletion and complementation were verified through PCR and qPCR using paired primers to examine correct recombination events (S1B–S1D Fig). Additionally, *BbTFO1* transcription was not detected in the deletion strains, but similar transcription levels were detected in the WT and complementary strains (S1D Fig).

### Contribution of BbTFO1 to chemical stress tolerance

The growth of deletion, complementation, and WT strains in different nutrient and chemical stress media is shown in Fig 1. The colony size of deletion strains was similar to that of control strains, and there was no significant difference with those in the rich medium SDAY, nutrient-deficient medium 1/4 SDAY, or minimal medium CPZ (Tukey's HSD,  $P > 0.05$ ) (Fig 1). Similar results were also found in CPZ medium containing NaCl and Congo red (Tukey's HSD,  $P > 0.05$ ). Nevertheless,  $\Delta$ *BbTFO1* showed markedly higher sensitivity to OS than the control strains (Tukey's HSD,  $P < 0.05$ ). The above findings indicate that BbTFO1 plays an essential role in maintaining OS tolerance but not in responding to other nutritional and chemical stresses.

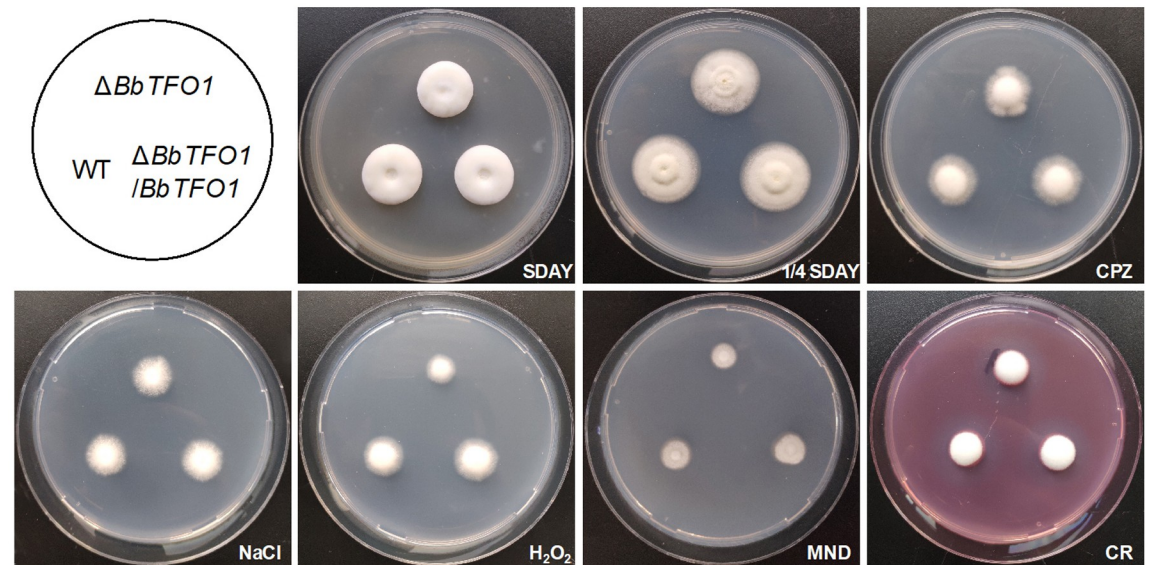

**Fig 1. The growth of fungal colonies on SDAY, 1/4 SDAY, CPZ and CPZ containing NaCl (0.5 M), H<sub>2</sub>O<sub>2</sub> (2 mM), menadione (MND: 0.2 mM) and Congo red (CR: 3 μg ml<sup>-1</sup>).** The media were incubated for a period of 7 days at 25°C, and then photos were taken. Note that the  $\Delta BbTFO1$  strains of *BbTFO1* grew smaller than the WT and  $\Delta BbTFO1/BbTFO1$  strains on CPZ containing H<sub>2</sub>O<sub>2</sub> and menadione.

<https://doi.org/10.1371/journal.pone.0249350.g001>

### Transcriptional changes in antioxidant-related genes in $\Delta BbTFO1$

The colony size of deletion strains decreased by 41% and 63% compared with the control in CPZ medium containing menadione and H<sub>2</sub>O<sub>2</sub>, respectively (Fig 2A). However, the colony size of the deletion strain was not significantly different from that of the control in CPZ medium (Fig 2A).  $\Delta BbTFO1$  showed markedly high sensitivity to OS compared with controls. According to the MIC<sub>50</sub> (Fig 2B), the deletion mutant also displayed high sensitivity to the oxidants H<sub>2</sub>O<sub>2</sub> (19%) and menadione (23%). To explain the reduced tolerance of  $\Delta BbTFO1$  to oxidative stress, the transcriptional levels of some antioxidant-related genes were analysed by qPCR. Among them, four of six CAT family genes and *Bbohmm* showed transcriptional downregulation compared with WT. Significantly, two key catalases, *cat2* and *cat5*, were transcriptionally repressed by 68% and 54%, respectively (Fig 2C), in response to OS in  $\Delta BbTFO1$  [23]. However, three of five SOD family genes showed transcriptional upregulation compared with WT. These results suggest that  $\Delta BbTFO1$  sensitivity to OS is accompanied by the transcriptional downregulation of these two key catalases.

### Role of *BbTFO1* in conidiation and conidial quality

For conidiation, the  $\Delta BbTFO1$  strain was decreased by 44%, 22% and 21% on days 5, 6, and 7 (Fig 3A), respectively, which was significantly different from the controls (Tukey's HSD,  $P < 0.05$ ). However, final  $\Delta BbTFO1$  conidiation was similar to that of the control strain (Tukey's HSD,  $P > 0.05$ ). These results showed that the deletion of *BbTFO1* affected conidiation growth but not conidiation ability. Moreover, the production of blastospores at 25°C showed no significant difference in  $\Delta BbTFO1$  compared with the corresponding controls (Tukey's HSD,  $P > 0.05$ , Fig 3B).

Despite having no impact on conidiation capacity and the production of blastospores, deletion of *BbTFO1* exerts a marked influence on conidial germination and thermotolerance. The  $\Delta BbTFO1$  mutant showed GT<sub>50</sub> values of 2.1 h and 2.5 h longer than those of the WT at 25°C

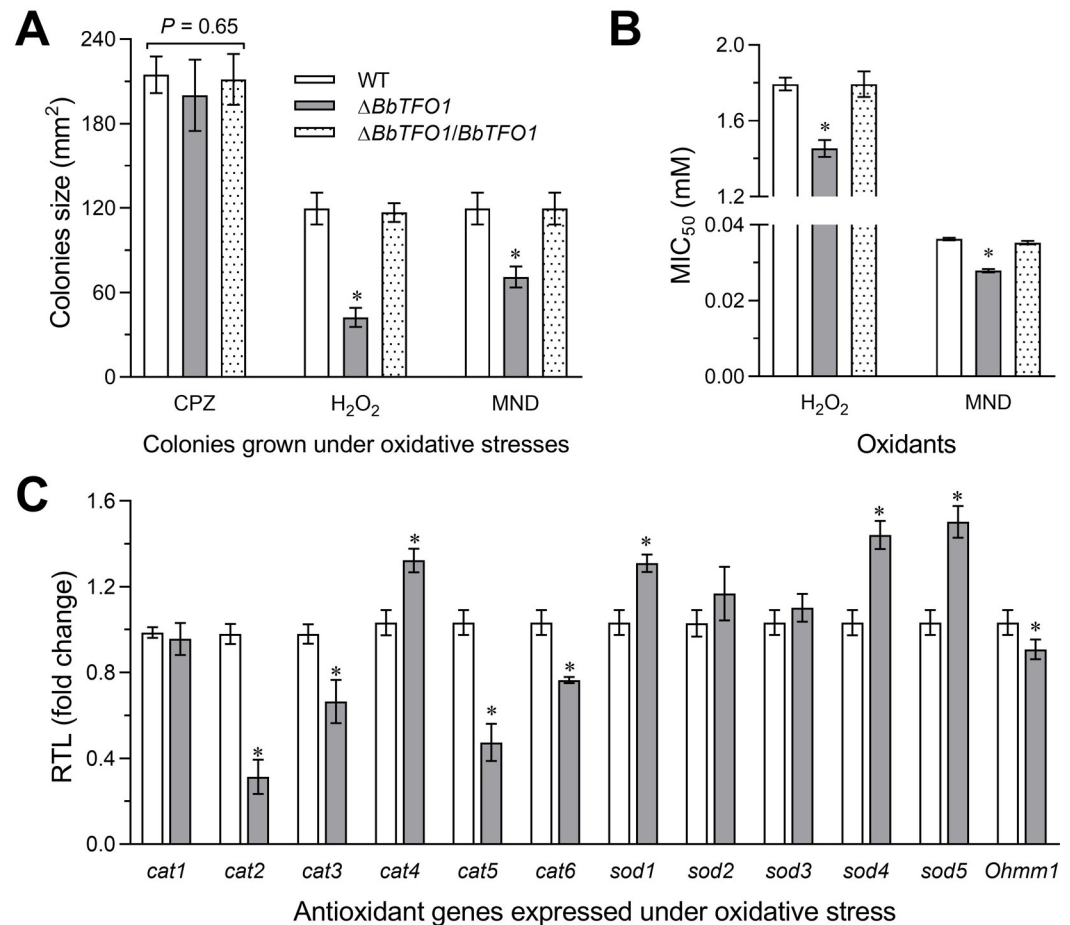

**Fig 2. Disruptions to *BbTFO1* affect OS resistance and antioxidant-related enzyme gene expression in *B. bassiana*.** (A) Colony size was measured on the seventh day of culture at 25°C after inoculation. (B) MIC<sub>50</sub> estimates for two oxidants (H<sub>2</sub>O<sub>2</sub> and menadione) to inhibit 50% fungal growth in diverse strains on CPZ at 25°C. (C) Relative antioxidant-related gene transcript levels of  $\Delta BbTFO1$  strains compared with WT cultured for 5 days at 25°C on CPZ containing H<sub>2</sub>O<sub>2</sub> (2 mM). The bar marked with an asterisk in each group shows a significant difference (Tukey's HSD,  $P < 0.05$ ). Error bars: SD of 3 repeated assays.

<https://doi.org/10.1371/journal.pone.0249350.g002>

and 35°C, respectively (Fig 3C). The colony sizes of  $\Delta BbTFO1$  decreased by 26% and 65% compared with WT at 30°C and 35°C, respectively (Fig 3D). Moreover, heat stress resistance of  $\Delta BbTFO1$  at 45°C decreased significantly compared with that of the WT strain, and its LT<sub>50</sub> decreased by 67% (Fig 3E). These data revealed the role of *BbTFO1* in conidial germination and its contribution to thermotolerance but not in the production of blastospores.

### Contribution of *BbTFO1* to insect virulence

For normal infection via the cuticular penetration method, time-mortality trends and means ( $\pm$  SD) LT<sub>50</sub> of *G. mellonella* larvae following conidial suspension immersion are shown in Fig 4A and 4B. On the ninth day after immersion, the mortality of the WT and complementation strain was close to 100%, while that of  $\Delta BbTFO1$  was approximately 80% (Fig 4A). The mean ( $\pm$  SD) LT<sub>50</sub> values of the WT and complementation strains against larvae were  $6.0 \pm 0.2$  and  $5.9 \pm 0.2$  days via normal cuticle penetration (Fig 4B), respectively. The mean ( $\pm$  SD) LT<sub>50</sub> values of the  $\Delta BbTFO1$  mutant against larvae were extended until  $7.3 \pm 0.3$  days (Fig 4B). For intrahemocoel injection, the mortality of the WT and complementation strains were close to

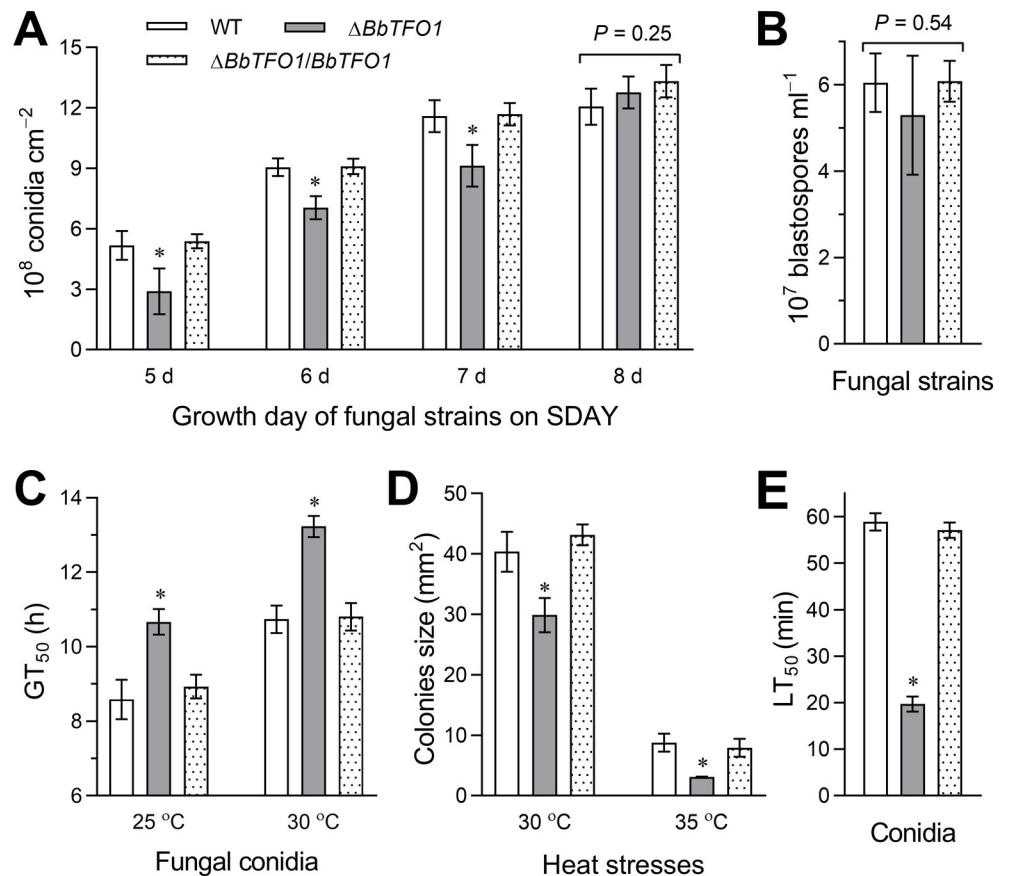

**Fig 3.** *BbTFO1* disruption affects fungal conidiation and conidial quality (A) Conidiation was counted daily from 5 days to 8 days on SDAY plates, which was started with smearing an appropriate amount of conidial suspension (100  $\mu$ l,  $10^7$  conidia  $\text{ml}^{-1}$ ). (B) The yield of blastospores was counted in NLB after 3 days of incubation at 25°C. (C) The  $\text{GT}_{50}$  (h) necessary to achieve 50% conidial germination at 25°C and 35°C. (D) Colony size in different strains grown at 30°C and 35°C for 7 days on CPZ medium. (E) The  $\text{LT}_{50}$  (min) of heat stress resistance in conidia at 45°C. The bar marked with an asterisk for every three-bar group showed a significant difference (Tukey's HSD,  $P < 0.05$ ). Error bars: SD of 3 replicates.

<https://doi.org/10.1371/journal.pone.0249350.g003>

100% on the fifth day after injection (Fig 4C); the mean ( $\pm$  SD)  $\text{LT}_{50}$  values of the WT and complementation were  $3.6 \pm 0.2$  and  $3.4 \pm 0.1$  days, respectively; and the mean  $\text{LT}_{50}$  of  $\Delta BbTFO1$  strains against the larvae increased to  $4.0 \pm 0.1$  days (Fig 4D). After 6 days of preservation under the optimal conditions, the fungal growth on larvae infected with the control strain was greater than that on the larvae killed by  $\Delta BbTFO1$  (Fig 4E).

To probe the potential reason for the reduced virulence by cuticle-bypassing infection with  $\Delta BbTFO1$ , haemolymph samples obtained from larvae that survived 72 h after injection were analysed. As a result, there were rich hyphal bodies in the control strains but rare hyphal bodies within the haemolymph samples from the larvae following injection with  $\Delta BbTFO1$  conidia (Fig 4F).

## Discussion

Compared with the controls, the  $\Delta BbTFO1$  strains showed significant defects in tolerance to OS, together with certain typical defects in phenotype related to the biological control potential of fungi, such as virulence and conidial quality. Typically, two catalase genes were markedly



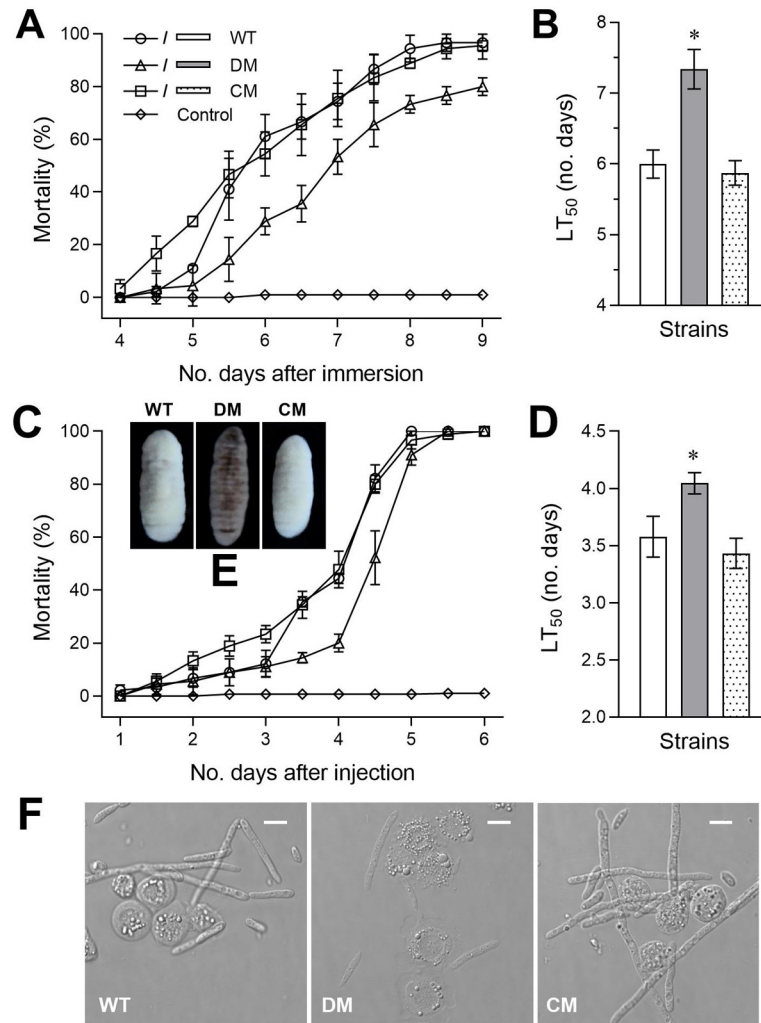

**Fig 4. *BbTFO1* deletion leads to defects in fungal pathogenicity.** (A, C) *G. mellonella* larval survival trend and (B, D)  $LT_{50}$  values after immersion in the  $10^7$  conidia  $ml^{-1}$  suspension to normally infect the cuticle and injection with  $\sim 500$  conidia/larva through the haemocoel to achieve cuticle-bypassing infection. (E) Fungal outgrowth images of  $\Delta BbTFO1$  (DM),  $\Delta BbTFO1/BbTFO1$  (CM) and WT on the cadaver surface at 6 days after death. (F) Microscopic images (scale: 10  $\mu m$ ) of hyphal bodies within haemolymph samples collected from the surviving larvae at 72 h after injection. Filamentous cells were hyphal bodies, while subspherical and spherical cells were host haemocytes. The bar marked with an asterisk of the three-bar group showed a significant difference (Tukey's HSD,  $P < 0.05$ ). Error bars: SD of 3 replicates.

<https://doi.org/10.1371/journal.pone.0249350.g004>

downregulated in the deletion mutants. The complicated phenotypic changes caused by the deletion of *BbTFO1* are discussed below.

First, *B. bassiana* was subjected to biotic and abiotic OS in the field [24], which negatively affects the insect host infection capacity of fungi [25, 26]. Recently, more than 24 antioxidant enzymes showing dispersion within diverse families have been analysed for *B. bassiana* [27]. Some SODs in entomopathogenic fungi have been demonstrated to be crucial factors of fungal biocontrol potential [28]. Five members of the SOD family characterized in *B. bassiana* showed that Sod2 and Sod3 played a dominant role in fungal SOD activity [28, 29]. Each type of peroxide can be decomposed by members of the peroxidase (POD) family, including larger hydrogen peroxide,  $H_2O_2$  and xenobiotics. KatG1, a bifunctional catalase-peroxidase, has been

suggested to display POD and CAT activities, which play a vital role in chemical OS tolerance in *Metarhizium acridum* [24]. Both the GRX-GLR and TRX-TRR families have been examined to analyse their impacts on the antioxidation of *B. bassiana* [30, 31]. Some strong antioxidant genes have been adopted for entomopathogenic fungal genetic engineering for the sake of enhancing biological control abilities [32]. Overexpression of cytoplasmic manganese core superoxide dismutase (BbSod2) in *B. bassiana* significantly increased antioxidant capacity, UV-B virulence and tolerance [33].

In addition, catalase family members decompose  $H_2O_2$ . Knockout mutants of catalases have shown discrete phenotypes in susceptibility to oxidative, heat, and UV-B stress in *B. bassiana* [34]. Among them, *cat5*, *cat1* and *cat4* are influential virulence factors, while *cat1* and *cat4* show equal importance to the regulation of UV-B resistance of conidia, with *cat2* ranking second. In addition, *cat1* is the most important regulator of conidial heat tolerance. It is believed that the CAT family affects fungal virulence by changing other virulence-related phenotypes of *B. bassiana* [23, 27]. Prior studies have shown that total catalase activity decreased by 89% and 56% in  $\Delta cat2$  and  $\Delta cat5$ , respectively, while this decrease was only 9–12% in additional *B. bassiana* catalase knockout mutants [23]. *cat2* and *cat5* exert viral parts in *B. bassiana* antioxidation of catalase family [23]. Moreover, *BbTFO1* deletion led to four of six CAT family genes showing transcriptional downregulation compared with the WT. In particular, the two key catalases *cat2* and *cat5* were transcriptionally repressed by 68% and 54%, respectively. In  $\Delta BbTFO1$ , the defect of colony growth under OS may be due to the repression of catalase gene expression. Therefore, it was speculated that *BbTFO1* can contribute to fungal antioxidation by affecting the expression of catalase genes. Beyond expectation, the absence of *BbTFO1* did not increase the sensitivity to cell wall stressors in *B. bassiana*, while for additional fungi, such as *C. albicans*, *NDT80* deletion resulted in enhanced sensitivity to Congo red and SDS [2]. The lack of *NDT80* resulted in a denser biofilm relative to WT and might initiate the *TEC1*-dependent compensatory response, mainly through the *TEC1-ROB1* pathway [35].

Second, according to a previous report in *C. albicans* [2], *NDT80* deletion mutants also showed sensitivity to heat stress in *B. bassiana*. Heat stress could promote cellular ROS generation, thereby damaging certain biomolecules, such as DNA, lipids or proteins [33, 36]. Antioxidant enzymes can scavenge diverse intracellular ROS [27, 37]. Typically, SOD can decompose superoxide anions and produce  $H_2O_2$  and oxygen [38], while  $H_2O_2$  can be additionally decomposed to oxygen and water via catalase [39]. In the present work, 4 catalase gene expression levels, especially *cat2* and *cat5*, in  $\Delta BbTFO1$  were repressed, resulting in a decrease in fungal ability to decompose  $H_2O_2$ , which naturally caused the reduced tolerance of  $\Delta BbTFO1$  conidia to high temperature. In addition, *BbTFO1* knockout mutants were demonstrated to suffer defects in the development of conidiation and conidial germination. Similarly, the XprG mutant was slightly slower to initiate conidiation development in *A. nidulans* [4]. Conidial quality is also considered an essential virulence factor of *B. bassiana* [40]. In this study, defects in conidial quality may be one of the reasons for the decrease in virulence.

Finally, *BbTFO1* mutants showed reduced virulence to hosts in *B. bassiana* by immersion and injection, as observed in *NDT80* mutants of *C. albicans*. The virulence loss of *NDT80* mutants in *C. albicans* may be associated with the critical part of *NDT80* in the control of hyphal growth and stress resistance [2, 8]. An *NDT80* homologue in *F. oxysporum* (Suf, suppressor of fusion) is associated with horizontal transport of virulence gene-carrying small chromosomes under conditions with limited nutrients [10]. For *B. bassiana*, the host immune response will produce cytotoxic molecules such as ROS when it infects insects [41]. Host phagocytes also generate reactive oxygen intermediates (ROIs), which are toxic to a variety of microorganisms [42]. Based on this experiment, it was believed that the disruption of *BbTFO1* leads to a reduction in the transcription levels of four catalases and complex phenotypic

changes, which are responsible for the reduction in fungal virulence. Catalase is considered a potential virulence factor in pathogenic fungi [23]. Overexpression of one catalase led to increased virulence of *B. bassiana* [43]. Catalase deletion within *A. fumigatus* mycelium and conidia leads to a significant decrease in virulence to mice [44]. In *Magnaporthe grisea*, the absence of *cat2* enhances fungal sensitivity to OS and significantly decreases virulence to barley [45]. An NDT80-like protein was further examined in *A. fumigatus*, a pathogenic fungus in animals, showing that XprG makes no difference in the virulence of mice [9]. The deletion of *BbTFO1* leads to defects in antioxidant capacity and germination defects, indicating that *BbTFO1* is a critical virulence factor of *B. bassiana*.

## Conclusion

Our results confirmed the previously reported functional diversity of NDT80-like proteins in different fungi [7]. In addition, BbTFO1 plays a crucial role in antioxidant activity, thermotolerance, conidiation, conidial quality and virulence in *B. bassiana*. According to transcript analysis, BbTFO1 can positively affect the expression of two key catalases to influence the antioxidant capacity of fungi, following the impact of the *B. bassiana* biological control potential.

## Supporting information

### S1 Fig. Bioinformatics description of BbTFO1 and generation of its mutant strains. (A)

Phylogenetic tree of *B. bassiana* NDT80 homologues and additional fungi. The NCBI accession codes for all proteins, together with the sequence identities in *B. bassiana*, are provided in brackets after the fungal names. (B) Sketch map of *BbTFO1* deletion strategy. (C) *BbTFO1* deletion identification (lanes 1–3) by PCR. Lane M: DNA marker (bp). Lane CK: blank control. Lane 1: WT. Lane 2:  $\Delta BbTFO1$ . Lane 3:  $\Delta BbTFO1/BbTFO1$ . (D) Identification of *BbTFO1* deletion by qPCR.

(TIF)

### S1 Raw images.

(PDF)

## Author Contributions

**Conceptualization:** Juan-Juan Wang, Lei Qiu.

**Data curation:** Ya-Ping Yin.

**Methodology:** Juan-Juan Wang.

**Software:** Juan-Juan Wang, Wen Cheng.

**Writing – original draft:** Ya-Ping Yin, Ji-Zheng Song, Shun-Juan Hu.

**Writing – review & editing:** Lei Qiu.

## References

1. Katz ME, Cooper S. Extreme Diversity in the Regulation of Ndt80-Like Transcription Factors in Fungi. *G3-Genes Genomes Genetics*. 2015; 5(12): 2783–92. <https://doi.org/10.1534/g3.115.021378> PMID: 26497142
2. Min K, Biermann A, Hogan DA, Konopka JB. Genetic Analysis of NDT80 Family Transcription Factors in *Candida albicans* Using New CRISPR-Cas9 Approaches. *MSphere*. 2018; 3(6): e00545–18. <https://doi.org/10.1128/mSphere.00545-18> PMID: 30463924

3. Hutchison EA, Glass NL. Meiotic Regulators Ndt80 and Ime2 Have Different Roles in *Saccharomyces* and *Neurospora*. *Genetics*. 2010; 185(4): 1271–82. <https://doi.org/10.1534/genetics.110.117184> PMID: 20519745
4. Katz ME, Braunberger K, Yi G, Cooper S, Nonhebel HM, Gondro C. A p53-like transcription factor similar to Ndt80 controls the response to nutrient stress in the filamentous fungus, *Aspergillus nidulans*. *F1000Res*. 2013; 2: 72. <https://doi.org/10.12688/f1000research.2-72.v1> PMID: 24358888
5. Dementhon K, Iyer G, Glass NL. VIB-1 is required for expression of genes necessary for programmed cell death in *Neurospora crassa*. *Eukaryot Cell*. 2006; 5(12): 2161–73. <https://doi.org/10.1128/EC.00253-06> PMID: 17012538
6. Chen CG, Yang YL, Shih HI, Su CL, Lo HJ. CaNdt80 is involved in drug resistance in *Candida albicans* by regulating *CDR1*. *Antimicrob Agents Chemother*. 2004; 48(12): 4505–12. <https://doi.org/10.1128/AAC.48.12.4505-4512.2004> PMID: 15561818
7. Katz ME. Nutrient sensing—the key to fungal p53-like transcription factors? *Fungal Genet Biol*. 2019; 124: 8–16. <https://doi.org/10.1016/j.fgb.2018.12.007> PMID: 30579885
8. Sellam A, Askew C, Epp E, Tebbji F, Mullick A, Whiteway M, et al. Role of transcription factor CaNdt80p in cell separation, hyphal growth, and virulence in *Candida albicans*. *Eukaryot Cell*. 2010; 9(4): 634–44. <https://doi.org/10.1128/EC.00325-09> PMID: 20097739
9. Shemesh E, Hanf B, Hagag S, Attias S, Shadkchan Y, Fichtman B, et al. Phenotypic and Proteomic Analysis of the *Aspergillus fumigatus*  $\Delta PrtT$ ,  $\Delta prG$  and  $\Delta prG/\Delta PrtT$  Protease-Deficient Mutants. *Front Microbiol*. 2017; 8: 2490. <https://doi.org/10.3389/fmicb.2017.02490> PMID: 29312198
10. Shahi S, Fokkens L, Houterman PM, Rep M. Suppressor of fusion, a *Fusarium oxysporum* homolog of Ndt80, is required for nutrient-dependent regulation of anastomosis. *Fungal Genet Biol*. 2016; 95: 49–57. <https://doi.org/10.1016/j.fgb.2016.08.005> PMID: 27531696
11. Kappel L, Gaderer R, Flippi M, Seidl-Seiboth V. The *N*-acetylglucosamine catabolic gene cluster in *Trichoderma reesei* is controlled by the Ndt80-like transcription factor RON1. *Mol. Microbiol*. 2016; 99(4): 640–57. <https://doi.org/10.1111/mmi.13256> PMID: 26481444
12. Wang C, Wang S. Insect Pathogenic Fungi: Genomics, Molecular Interactions, and Genetic Improvements. *Annu Rev Entomol*. 2017; 62(1): 73–90. <https://doi.org/10.1146/annurev-ento-031616-035509> PMID: 27860524
13. Zhang SZ, Xia YX, Kim B, Keyhani NO. Two hydrophobins are involved in fungal spore coat rodlet layer assembly and each play distinct roles in surface interactions, development and pathogenesis in the entomopathogenic fungus, *Beauveria bassiana*. *Mol Microbiol*. 2011; 80(3): 811–26. <https://doi.org/10.1111/j.1365-2958.2011.07613.x> PMID: 21375591
14. He Z, Zhao X, Gao Y, Keyhani NO, Wang H, Deng J, et al. The fungal mitochondrial membrane protein, BbOhmm, antagonistically controls hypoxia tolerance. *Environ Microbiol*. 2020; 22(7): 2514–35. <https://doi.org/10.1111/1462-2920.14910> PMID: 31894607
15. Ding JL, Lin HY, Feng MG, Ying SH. Mbp1, a component of the MluI cell cycle box-binding complex, contributes to morphological transition and virulence in the filamentous entomopathogenic fungus *Beauveria bassiana*. *Environ Microbiol*. 2020; 22(2): 584–97. <https://doi.org/10.1111/1462-2920.14868> PMID: 31743555
16. Zhao X, Yang X, Lu Z, Wang H, He Z, Zhou G, et al. MADS-box transcription factor Mcm1 controls cell cycle, fungal development, cell integrity and virulence in the filamentous insect pathogenic fungus *Beauveria bassiana*. *Environ Microbiol*. 2019; 21: 3392–416. <https://doi.org/10.1111/1462-2920.14629> PMID: 30972885
17. Wang JJ, Cai Q, Qiu L, Ying SH, Feng MG. The histone acetyltransferase Mst2 sustains the biological control potential of a fungal insect pathogen through transcriptional regulation. *Appl Microbiol Biotechnol*. 2017; 102(3): 1343–55. <https://doi.org/10.1007/s00253-017-8703-9> PMID: 29275430
18. Qiu L, Wang JJ, Chu ZJ, Ying SH, Feng MG. Phytochrome controls conidiation in response to red/far-red light and daylight length and regulates multistress tolerance in *Beauveria bassiana*. *Environ Microbiol*. 2014; 16(7): 2316–28. <https://doi.org/10.1111/1462-2920.12486> PMID: 24725588
19. Qiu L, Wei XY, Wang SJ, Wang JJ. Characterization of trehalose-6-phosphate phosphatase in trehalose biosynthesis, asexual development, stress resistance and virulence of an insect mycopathogen. *Pest Biochem Physiol*. 2020; 163: 185–92. <https://doi.org/10.1016/j.pestbp.2019.11.016> PMID: 31973856
20. Qiu L, Wang JJ, Ying SH, Feng MG. Wee1 and Cdc25 control morphogenesis, virulence and multistress tolerance of *Beauveria bassiana* by balancing cell cycle-required cyclin-dependent kinase 1 activity. *Environ Microbiol*. 2015; 17(4): 1119–33. <https://doi.org/10.1111/1462-2920.12530> PMID: 24910927

21. Shao W, Cai Q, Tong SM, Ying SH, Feng MG. Rei1-like protein regulates nutritional metabolism and transport required for the asexual cycle *in vitro* and *in vivo* of a fungal insect pathogen. *Environ Microbiol.* 2019; 21(8): 2772–86. <https://doi.org/10.1111/1462-2920.14616> PMID: 30932324
22. Zhu XG, Tong SM, Ying SH, Feng MG. Antioxidant activities of four superoxide dismutases in *Metarhizium robertsii* and their contributions to pest control potential. *Appl Microbiol Biotechnol.* 2018; 102(21): 9221–30. <https://doi.org/10.1007/s00253-018-9302-0> PMID: 30120522
23. Wang ZL, Zhang LB, Ying SH, Feng MG. Catalases play differentiated roles in the adaptation of a fungal entomopathogen to environmental stresses. *Environ Microbiol.* 2013; 15(2): 409–18. <https://doi.org/10.1111/j.1462-2920.2012.02848.x> PMID: 22891860
24. Li G, Fan A, Peng G, Keyhani NO, Xin J, Cao Y, et al. A bifunctional catalase-peroxidase, *MakatG1*, contributes to virulence of *Metarhizium acridum* by overcoming oxidative stress on the host insect cuticle. *Environ Microbiol.* 2017; 19(10): 4365–78. <https://doi.org/10.1111/1462-2920.13932> PMID: 28925548
25. Keyser CA, Fernandes éKK, Rangel DEN, Roberts DW. Heat-induced post-stress growth delay: A biological trait of many *Metarhizium* isolates reducing biocontrol efficacy? *J Invertebr Pathol.* 2014; 120: 67–73. <https://doi.org/10.1016/j.jip.2014.05.008> PMID: 24909120
26. Fernandes EKK, Rangel DEN, Braga GUL, Roberts DW. Tolerance of entomopathogenic fungi to ultraviolet radiation: a review on screening of strains and their formulation. *Curr Genet.* 2015; 61(3): 427–40. <https://doi.org/10.1007/s00294-015-0492-z> PMID: 25986971
27. Zhang LB, Feng MG. Antioxidant enzymes and their contributions to biological control potential of fungal insect pathogens. *Appl Microbiol Biotechnol.* 2018; 102(12): 4995–5004. <https://doi.org/10.1007/s00253-018-9033-2> PMID: 29704043
28. Li F, Shi HQ, Ying SH, Feng MG. Distinct contributions of one Fe- and two Cu/Zn-cofactored superoxide dismutases to antioxidation, UV tolerance and virulence of *Beauveria bassiana*. *Fungal Genet Biol.* 2015; 81: 160–71. <https://doi.org/10.1016/j.fgb.2014.09.006> PMID: 25263710
29. Xie XQ, Li F, Ying SH, Feng MG. Additive Contributions of Two Manganese-Cored Superoxide Dismutases (MnSODs) to Antioxidation, UV Tolerance and Virulence of *Beauveria bassiana*. *PLoS One.* 2012; 7(1): e30298. <https://doi.org/10.1371/journal.pone.0030298> PMID: 22279579
30. Mashamaite LN, Rohwer JM, Pillay CS. The glutaredoxin mono- and di-thiol mechanisms for deglutathionylation are functionally equivalent: implications for redox systems biology. *Biosci Rep.* 2015; 35: 1–10. <https://doi.org/10.1042/BSR20140157> PMID: 25514238
31. Zhang LB, Tang L, Ying SH, Feng MG. Distinct roles of two cytoplasmic thioredoxin reductases (Trr1/2) in the redox system involving cysteine synthesis and host infection of *Beauveria bassiana*. *Appl Microbiol Biotechnol.* 2016; 100(24): 10363–74. <https://doi.org/10.1007/s00253-016-7688-0> PMID: 27344592
32. Lovett B, St Leger RJ. Genetically engineering better fungal biopesticides. *Pest Manag Sci.* 2018; 74(4): 781–9. <https://doi.org/10.1002/ps.4734> PMID: 28905488
33. Xie XQ, Wang J, Huang BF, Ying SH, Feng MG. A new manganese superoxide dismutase identified from *Beauveria bassiana* enhances virulence and stress tolerance when overexpressed in the fungal pathogen. *Appl Microbiol Biotechnol.* 2010; 86(5): 1543–53. <https://doi.org/10.1007/s00253-010-2437-2> PMID: 20094711
34. Ortiz-Urquiza A, Keyhani NO. Stress response signaling and virulence: insights from entomopathogenic fungi. *Curr Genet.* 2015; 61: 239–249. <https://doi.org/10.1007/s00294-014-0439-9> PMID: 25113413
35. Glazier VE, Murante T, Murante D, Koselny K, Liu Y, Kim D, et al. Genetic analysis of the *Candida albicans* biofilm transcription factor network using simple and complex haploinsufficiency. *PLoS Genet.* 2017; 13(8): 25. <https://doi.org/10.1371/journal.pgen.1006948> PMID: 28793308
36. Perez-Guzman D, Montesinos-Matias R, Arce-Cervantes O, Gomez-Quiroz LE, Loera O, Garza-Lopez PM. Reactive oxygen species production, induced by atmospheric modification, alter conidial quality of *Beauveria bassiana*. *J Appl Microbiol.* 2016; 121(2): 453–60. <https://doi.org/10.1111/jam.13156> PMID: 27107399
37. Tong SM, Feng MG. Phenotypic and molecular insights into heat tolerance of formulated cells as active ingredients of fungal insecticides. *Appl Microbiol Biotechnol.* 2020; 104(13): 5711–24. <https://doi.org/10.1007/s00253-020-10659-z> PMID: 32405755
38. Alschér RG, Ertürk N, Heath LS. Role of superoxide dismutases (SODs) in controlling oxidative stress in plants. *J Exp Bot.* 2002; 53: 1331–41. <https://doi.org/10.1093/jxb/53.372.1331> PMID: 11997379
39. Schouten A, Tenberge KB, Vermeer J, Stewart J, Wagemakers L, Williamson B, et al. Functional analysis of an extracellular catalase of *Botrytis cinerea*. *Mol Plant Pathol.* 2002; 3(4): 227–38. <https://doi.org/10.1046/j.1364-3703.2002.00114.x> PMID: 20569330

40. Keyhani NO. Lipid biology in fungal stress and virulence: Entomopathogenic fungi. *Fungal Biol.* 2018; 122(6): 420–9. <https://doi.org/10.1016/j.funbio.2017.07.003> PMID: 29801785
41. Trevijano-Contador N, Zaragoza O. Immune Response of *Galleria mellonella* against Human Fungal Pathogens. *J Fungi.* 2019; 5(1): 13. <https://doi.org/10.3390/jof5010003> PMID: 30587801
42. Sheehan G, Kavanagh K. Analysis of the early cellular and humoral responses of *Galleria mellonella* larvae to infection by *Candida albicans*. *Virulence.* 2018; 9(1): 163–72. <https://doi.org/10.1080/21505594.2017.1370174> PMID: 28872999
43. Chantasingh D, Kitikhun S, Keyhani NO, Boonyapakron K, Thoetkiattikul H, Pootanakit K, et al. Identification of catalase as an early up-regulated gene in *Beauveria bassiana* and its role in entomopathogenic fungal virulence. *Biol Control.* 2013; 67(2):85–93. <http://dx.doi.org/10.1016/j.biocontrol.2013.08.004>
44. Paris S, Wysong D, Debeaupuis JP, Shibuya K, Philippe B, Diamond RD, et al. Catalases of *Aspergillus fumigatus*. *Infect Immun.* 2003; 71(6): 3551–62. <https://doi.org/10.1128/iai.71.6.3551-3562.2003> PMID: 12761140
45. Skamnioti P, Henderson C, Zhang Z, Robinson Z, Jane Gurr S. A Novel Role for Catalase B in the Maintenance of Fungal Cell-Wall Integrity During Host Invasion in the Rice Blast Fungus *Magnaporthe grisea*. *Mol Plant-Microbe Interact.* 2007; 20: 568–80. <https://doi.org/10.1094/MPMI-20-5-0568> PMID: 17506334
